# Supplementary material
Source: Springer Nature journal article supplement (https://www.springermedizin.de/resource/supplementary/12960_2013_354_MOESM7_ESM.docx/9569914)
Supplement: MOESM7 [file 9569914]

| **Health workforce**  Information sources | Variables | Comments |
| --- | --- | --- |
| Medical’ Council (*Ordem dos Médicos*)  Registration | Name  Address of residence  Age  Year of graduation  School of graduation  Specialization (most of the times) | - Only demographic characteristics and geographical distribution based on the area of residence. - Lack of information on register updating as a result of, for example, long-term absence, death, retiring. |
| Nursing Council (*Ordem dos Enfermeiros*)  Registration | Name  Address  Age  Year of graduation  School of graduation  Place of work  Specialization | - Demographic characteristics and geographical distribution based on place of work. - Lack of information on register updating as a result of, for example, long-term absence, death, retiring. |
| Portuguese Dental Association  (*Ordem dos Médicos dentistas)*  Registration | Name  Address  Age  Year of graduation  School of graduation  Place of work  Place of Residence  Nationality | - Demographic characteristics and geographical distribution based on the area of residence and work. - Lack of information on register updating as a result of, for example, long-term absence or death. |
| Pharmacists’ Council *(Ordem dos Farmacêuticos)*  Registration | Name  Address  Age  Sex  Professional area | - Demographic characteristics and geographical distribution based on the area of residence. - Lack of information on register updating as a result of, for example, long-term absence or death. |
| INE, Statistics Portugal  National population census "Activities of human health" | Resident Population according to sector of activity. | - The national population censuses provide the broadest picture available of the workforce in general and specifically of the healthcare workforce - Last one in 2011 |
| INE, Statistics Portugal  Health workforce statistics |  | INE uses the databases from the administrative proceedings of professional association (Councils and Labour unions) |
| Central Administration of the National Health Service, Ministry of Health *(ACSS Administração Central do Sistema de Saúde)*  Health personnel database | Annual data;  Nationality,  Profession  Age  Sex  Place of work (Health Region, hospital, primary health care)  Professional specialization | - Personnel working on the national health service (mainland, not including the islands of Azores and Madeira) - Comparison of data in temporal trends is possible only for national aggregated data. |
| Ministry of Labour and Social Affairs – Strategy and planning office (*Ministério do Trabalho e da Segurança Social - Gabinete de estratégia e planeamento*)  Personnel list from all the enterprises with workers (Quadro de pessoal) | Annual data;  Workers nationality  Remuneration  Contract types  Remunerated number of hours by month, normal and supplementary hours | - The legal imperative of providing the information exists for all the enterprises but the practice is that the public ones do not perform this duty regularly |
| Portuguese Foreigners and Border Affairs Department *(Serviço de Estrangeiros e Fronteiras)*  Request of residency in Portugal | Nationality  Profession that allows to have ways of living at the moment of making the request of residency  Age, sex  Level of education | - Information on foreigners but the declared profession might be different from that the person had on its country of origin. |
